# Supplementary material
Source: PubMed Central journal article supplement (PMC3680629)
Supplement: NIHMS459031-supplement-04.pdf [file NIHMS459031-supplement-04.pdf]

Table S4. Summary of Simulations, Related to Experimental Procedures

| Description                                                     | Number of atoms<br>(rounded to 1,000) | Duration ( $\mu$ s)    | Membrane<br>size ( $\text{\AA}^2$ ) | Illustration |
|-----------------------------------------------------------------|---------------------------------------|------------------------|-------------------------------------|--------------|
| <b>Simulations of the extracellular domains</b>                 |                                       |                        |                                     |              |
| Tethered extracellular monomer                                  | 241,000; 251,000                      | 3.6; 2.7               | NA                                  | Figure 2     |
| Extended extracellular monomer with EGF                         | 394,000                               | 5.5                    |                                     | Figure 2     |
| Extended extracellular monomer without EGF                      | 395,000                               | 5.4                    |                                     | Figure 2     |
| The 2-ligand extracellular dimer                                | 272,000–391,000                       | 12.8; 6.2              |                                     | Figure 3, S1 |
| The 2-ligand extracellular dimer (CHARMM22*)                    | 271,000                               | 10.2; 10.5; 8.7        |                                     | Figure S1    |
| The 1-ligand extracellular dimer                                | 272,000                               | 14.1; 10.7             |                                     | Figure 3, S1 |
| The 1-ligand extracellular dimer (CHARMM22*)                    | 271,000                               | 15.0; 10.5; 10.8       |                                     | Figure S1    |
| The ligand-free extracellular dimer                             | 272,000                               | 11.0                   |                                     | Figure 3, S1 |
| The ligand-free extracellular dimer (CHARMM22*)                 | 271,000                               | 16.6; 7.5              |                                     | Figure S1    |
| <b>Simulations of the transmembrane segments</b>                |                                       |                        |                                     |              |
| The N-terminal transmembrane dimer                              | 38,000                                | 100.2; 51.2            | 68 × 68                             | Figure 4     |
| The C-terminal transmembrane dimer                              | 35,000–38,000                         | 30.4; 14.5; 10.7; 33.4 | 68 × 68                             | Figure 4     |
| The N-terminal transmembrane dimer (I640E)                      | 36,000                                | 38.6                   | 68 × 68                             | Figure 4     |
| The N-terminal transmembrane dimer (T624L, G625L, G628L, A629L) | 36,000                                | 19.2; 18.5; 18.5; 18.1 | 68 × 68                             | Figure S2    |
| The N-terminal transmembrane dimer (T624I/G625I/G628I/A629I)    | 36,000                                | 5.2; 1.3               | 68 × 68                             | Figure S2    |
| The C-terminal transmembrane dimer (I640E)                      | 36,000                                | 19.0; 33.9             | 68 × 68                             | Figure 4     |
| Self-assembly simulation with 4 transmembrane helices           | 37,000                                | 201.2                  | 68 × 68                             | Figure 4     |
| Self-assembly simulation with 9 transmembrane helices           | 37,000                                | 103.1                  | 68 × 68                             | Figure 4     |
| The HER2 N-terminal transmembrane dimer                         | 33,000                                | 134.6                  | 68 × 68                             | Figure S2    |
| The HER2 C-terminal transmembrane dimer                         | 34,000                                | 120.8                  | 68 × 68                             | Figure S2    |

| <b>Simulations of the TM–JM–A construct</b>                              |         |                         |           |              |
|--------------------------------------------------------------------------|---------|-------------------------|-----------|--------------|
| The N-terminal transmembrane dimer and the JM-A dimer                    | 45,000  | 125.0; 40.3             | 70 × 70   | Figure 5, S3 |
| The N-terminal transmembrane dimer and the JM-A dimer (in DMPC bilayer)  | 46,000  | 19.0; 14.5, 14.3; 103.0 | 70 × 70   | Figure 5, S3 |
| The left-handed transmembrane dimer and the JM-A dimer (in DMPC bilayer) | 46,000  | 5.1; 10.1               | 70 × 70   | Figure S3    |
| The C-terminal transmembrane dimer and the JM-A dimer                    | 39,000  | 30.4; 6.4               | 70 × 70   | Figure 5, S3 |
| The TM–JM–A monomer                                                      | 48,000  | 18.8; 10.3              | 68 × 68   | Figure 5, S3 |
| <b>Simulations of the TM–JM–KD construct</b>                             |         |                         |           |              |
| The TM–JM–KD, monomer                                                    | 121,000 | 2.7                     | 94 × 94   | Figure 7, S4 |
| The TM–JM–KD, active dimer                                               | 244,000 | 21.7                    | 138 × 138 | Figure 7, S4 |
| The TM–JM–KD, inactive dimer                                             | 229,000 | 26.7; 11.5              | 138 × 138 | Figure 7, S4 |
| The TM–JM–KD, inactive dimer (7.5% POPS)                                 | 204,000 | 10.2                    | 138 × 138 | Figure 7, S4 |
| The TM–JM–KD, inactive dimer (2.5% POPS)                                 | 246,000 | 16.6                    | 138 × 138 | Figure 7, S4 |
| The TM–JM–KD, inactive dimer (without POPS)                              | 263,000 | 8.7                     | 138 × 138 | Figure 7, S4 |
| <b>Simulations of the monomer and dimers of the near-complete EGFR</b>   |         |                         |           |              |
| Monomer                                                                  | 229,000 | 4.7                     | 116 × 116 | Figure 6     |
| Inactive dimer                                                           | 422,000 | 4.1; 1.5; 2.1           | 148 × 148 | Figure 6     |
| Active dimer                                                             | 554,000 | 4.7                     | 150 × 150 | Figure 6     |
